1 **SmbHLH37 functions antagonistically with SmMYC2 in regulating**  
2 **jasmonate-mediated biosynthesis of phenolic acids in *Salvia miltiorrhiza***

3 Tang-Zhi Du<sup>#</sup>, Jun-Feng Niu<sup>#</sup>, Jiao Su, Sha-Sha Li, Xiao-Rong Guo, Lin Li,  
4 Xiao-Yan Cao<sup>\*</sup>, Jie-Fang Kang<sup>\*</sup>

5 National Engineering Laboratory for Resource Development of Endangered Crude  
6 Drugs in Northwest of China, Key Laboratory of the Ministry of Education for  
7 Medicinal Resources and Natural Pharmaceutical Chemistry, Shaanxi Normal  
8 University, Xi'an 710062, China

9 <sup>#</sup>These authors contributed equally to this work.

10 <sup>\*</sup>Authors for correspondence:

11 Xiaoyan Cao (Email: [caoxiaoyan@snnu.edu.cn](mailto:caoxiaoyan@snnu.edu.cn))

12 Jiefang Kang (Email: [kangjiefang@snnu.edu.cn](mailto:kangjiefang@snnu.edu.cn))

13 **Abstract**

14 Jasmonates (JAs) are integral to various defense responses and induce biosynthesis of  
15 many secondary metabolites. MYC2, a basic helix-loop-helix (bHLH) transcription  
16 factor (TF), acts as a transcriptional activator of JA signaling. MYC2 is repressed by  
17 the JASMONATE ZIM-domain (JAZ) proteins in the absence of JA, but de-repressed  
18 by the protein complex SCF<sup>COI1</sup> on perception of JA. We previously reported that  
19 overexpression of *SmMYC2* promotes the production of salvianolic acid B (Sal B) in  
20 *Salvia miltiorrhiza*. However, the responsible molecular mechanism is unclear. Here,  
21 we showed that SmMYC2 binds to and activates the promoters of its target genes  
22 *SmTAT1*, *SmPAL1*, and *SmCYP98A14* to activate Sal B accumulations. *SmbHLH37*, a  
23 novel bHLH gene significantly up-regulated by constitutive expression of *SmMYC2*,  
24 was isolated from *S. miltiorrhiza* for detailed functional characterization. *SmbHLH37*  
25 forms a homodimer and interacts with SmJAZ3/8. Overexpression of *SmbHLH37*  
26 substantially decreased yields of Sal B. *SmbHLH37* binds to the promoters of its  
27 target genes *SmTAT1* and *SmPAL1* and blocks their expression to suppress the  
28 pathway for Sal B biosynthesis. These results indicate that *SmbHLH37* negatively

29 regulates JA signaling and functions antagonistically with SmMYC2 in regulating Sal  
30 B biosynthesis in *S. miltiorrhiza*.

31 **Keywords:** bHLH, JA signaling, JAZ, secondary metabolites, *SmTAT1*, *SmPAL1*

## 32 **Abbreviations**

33 *SmbHLH37* *Salvia miltiorrhiza* basic helix-loop-helix 37  
34 *SmTAT1* *Salvia miltiorrhiza* tyrosine aminotransferase 1  
35 *SmPAL1* *Salvia miltiorrhiza* phenylalanine ammonialyase 1  
36 *SmCYP98A14* *Salvia miltiorrhiza* cytochrome P450 monooxygenase 98A14  
37 Sal B salvianolic acid B

## 38 **Introduction**

39 *Salvia miltiorrhiza* Bunge, a well-known member of the Labiatae family, is  
40 considered a model medicinal plant (Guo *et al.*, 2014). Its dry roots and rhizomes  
41 (called 'danshen' in Chinese) are widely applied in the treatment of various  
42 cerebrovascular and cardiovascular diseases (Han *et al.*, 2008; Zeng *et al.*, 2013; Su *et*  
43 *al.*, 2015). The major bioactive components of *S. miltiorrhiza* are classified as  
44 water-soluble phenolic acids, including salvianolic acid B (Sal B) and rosmarinic acid  
45 (RA); and lipid-soluble tanshinones such as cryptotanshinone and tanshinone IIA (Ma  
46 *et al.*, 2013; Ma *et al.*, 2015). Phenolic acids are attracting increased attention because  
47 of their marked pharmacological activities coupled with their traditional use as herbs  
48 steeped in boiling water in China. Among these phenolic acids, Sal B is predominant  
49 and is regarded for its antioxidant properties and scavenging of free radicals (Zhao *et*  
50 *al.*, 2008). It offers protection against fibrosis, tumor development, aging, and  
51 cardiovascular/cerebrovascular diseases (Zhao *et al.*, 2008; Tsai *et al.*, 2010).

52 The biosynthetic pathway of Sal B consists of a phenylalanine-derived pathway and  
53 tyrosine-derived pathway (Di *et al.*, 2013; Ma *et al.*, 2013; Wang *et al.*, 2015). In  
54 view of the economic value and clinical demand for this active ingredient, biological  
55 approaches have been taken to augment its synthesis, including the engineering of  
56 genes in the biosynthetic pathway and ectopic expression of transcription factors (TFs)

57 (Zhang *et al.*, 2010; Wang *et al.*, 2013; Zhang *et al.*, 2014; Zhou *et al.*, 2016; Yang *et al.*,  
58 *al.*, 2017). For example, AtPAP1 from *Arabidopsis thaliana* is a transcriptional  
59 activator of phenolic acid biosynthesis in *S. miltiorrhiza* (Zhang *et al.*, 2010; Zhang *et al.*,  
60 *al.*, 2014). Heterologous expression of two transcription factors, Delila (DEL) and  
61 Roseal (ROS1) from *Antirrhinum majus*, significantly elevates the production of Sal  
62 B in *S. miltiorrhiza* (Wang *et al.*, 2013). In addition, exogenous application of methyl  
63 jasmonate (MeJA) triggers an extensive transcriptional reprogramming of metabolism  
64 and dramatically increases Sal B biosynthesis in that species (Ge *et al.*, 2015).

65 Jasmonates (JAs) play crucial roles in plant responses to various stimuli and induce  
66 biosynthesis of many secondary metabolites (Browse, 2009; Zhou and Memelink,  
67 2016). The Jasmonate ZIM-domain (JAZ) proteins function as negative regulators to  
68 repress diverse JA responses (Chini *et al.*, 2007; Thines *et al.*, 2007; Seo *et al.*, 2011;  
69 Song *et al.*, 2011). Jasmonoyl-L-isoleucine (JA-Ile), the active form of JA, promotes  
70 the degradation of Jasmonate ZIM-domain (JAZ) proteins via the 26S proteasome  
71 system (Farmer, 2007; Sheard *et al.*, 2010). This is followed by de-repression of  
72 MYC2, a basic helix-loop-helix (bHLH) TF that has a central role in JA signaling,  
73 resulting in transcriptional activation of downstream target genes (Lorenzo *et al.*,  
74 2004; Chico *et al.*, 2008; Katsir *et al.*, 2008). Nine JAZ genes have been cloned from  
75 *S. miltiorrhiza* and some have been functionally verified as negative regulators of  
76 active ingredients in this species. For example, overexpression of *SmJAZ8*  
77 de-regulates the yields of salvianolic acids and tanshinones in MeJA-induced  
78 transgenic hairy roots (Ge *et al.*, 2015; Pei *et al.*, 2018). Both *SmJAZ3* and *SmJAZ9*  
79 act as repressive transcriptional regulators in the biosynthesis of tanshinones (Shi *et al.*,  
80 *al.*, 2016). However, *SmMYC2a* and *SmMYC2b*, two orthologs of MYC2, interact  
81 with *SmJAZs* and positively regulate the biosynthesis of tanshinones and Sal B in *S.*  
82 *miltiorrhiza* hairy roots (Zhou *et al.*, 2016).

83 The bHLH proteins, one of the largest TF families in plants, modulate various  
84 physiological or morphological events, including different branches of the flavonoid  
85 pathway (Carretero-Paulet *et al.*, 2010; Hichri *et al.*, 2011). The bHLH family

86 consists of an N-terminal stretch of basic amino acid residues responsible for DNA  
87 binding and an HLH domain to form homo- or heterodimers (Goossens *et al.*, 2016),  
88 which bind E-box sequences (CANNTG), such as the G-box (CACGTG), in the  
89 promoter of their target genes (Ezer *et al.*, 2017). The bHLHs are monophyletic and  
90 constitute 26 subfamilies characterized by the presence of highly conserved short  
91 amino acid motifs (Pires and Dolan, 2010). MYC2, a member of bHLH subgroup IIIe,  
92 positively regulates secondary metabolism during JA signaling in a species-specific  
93 manner (Dombrecht *et al.*, 2007; Todd *et al.*, 2010; Zhang *et al.*, 2011).  
94 JA-ASSOCIATED MYC2-LIKE1 (JAM1), JAM2, and JAM3 (bHLH17, -13, and -3,  
95 respectively) belong to the bHLH IIIId subfamily in *A. thaliana*. Each contains a  
96 domain that can interact with JAZ proteins and negatively regulate JA responses  
97 (Fonseca *et al.*, 2014; Sasaki-Sekimoto *et al.*, 2014). JAM1 substantially reduces  
98 those responses, inhibiting root growth and interrupting anthocyanin accumulations  
99 and male fertility (Nakata *et al.*, 2013). JAM2 and JAM3 have the same functions and  
100 act redundantly with JAM1 (Nakata and Ohme-Takagi, 2013). These JAMs  
101 antagonize MYC2, MYC3, and MYC4 during JA-induced leaf senescence by binding  
102 to the same target sequences of MYC-activated genes (Qi *et al.*, 2015a).

103 Zhang *et al.*, (2015) have identified 127 bHLH genes in *S. miltiorrhiza* based on  
104 genome-wide analyses. They have predicted seven *bHLHs*, including *SmbHLH37*,  
105 that are involved in tanshinone biosynthesis. However, the functions of those genes  
106 have not been characterized. We previously reported that overexpression of *SmMYC2*  
107 increases the production of phenolic acids in *S. miltiorrhiza* (Yang *et al.*, 2017).  
108 Further investigation showed that constitutive expression of that gene significantly  
109 up-regulates transcript levels of *SmbHLH37* (Su *et al.*, 2017). Multiple alignments of  
110 the *SmbHLH37* protein sequence with *AtbHLHs* from *Arabidopsis* have indicated  
111 that *SmbHLH37* is most closely correlated with *AtbHLH3* (JAM3), both of which  
112 belong to the IIIId subfamily (Su *et al.*, 2017). In the present study, we identified  
113 *SmbHLH37* as a new target of JAZ proteins. We then conducted overexpression  
114 experiments to explore the function of *SmbHLH37* in *S. miltiorrhiza*. Transgenic

115 overexpressing (OE) plants showed significantly lower accumulations of Sal B. We  
116 concluded that *SmbHLH37* antagonizes the previously reported transcription activator  
117 *SmMYC2* in controlling salvianolic acid biosynthesis in *S. miltiorrhiza* by binding to  
118 their downstream target sequences. Coordinated regulation of Sal B by this  
119 transcription repressor and activator provides clues about the previously unknown  
120 complex mechanism for directing the production of secondary metabolites.

## 121 **Materials and methods**

### 122 *Experimental materials*

123 Sterile *Salvia miltiorrhiza* plantlets were cultured on a Murashige and Skoog basal  
124 medium, as described previously (Yan and Wang, 2007). All chemicals were obtained  
125 from Sigma Chemical Co. (St. Louis, MO, USA). Solvents were of high-performance  
126 liquid chromatography (HPLC) grade. Standards of RA, Sal B, and JA were  
127 purchased from the National Institute for the Control of Pharmaceutical and  
128 Biological Products (Beijing, China). All were prepared as stock solutions in  
129 methanol and stored in the dark at  $-18^{\circ}\text{C}$ . Primer pairs are listed in [Supplementary](#)  
130 [Table 1](#) and [Table 2](#).

### 131 *Construction of plant expression vectors and plant transformation*

132 To construct the *SmbHLH37* overexpression vector, we amplified the full-length open  
133 reading frame (ORF) of *SmbHLH37* (GenBank Accession Number KP257470.1) with  
134 primers *GVsmbHLH37-F/R*, which introduced attB sites, and subsequently  
135 re-combined it into the pDONR207 vector (BP reaction Gateway®) according to the  
136 protocol from the Gateway manufacturer (Invitrogen, United States). The ENTRY  
137 vector pDONR207-*SmbHLH37* was sequenced and inserted into the pEarleyGate 202  
138 vector (Earley *et al.*, 2006) by an LR reaction (Gateway®) to generate the  
139 pEarleyGate 202-*SmbHLH37* overexpression vector. *Agrobacterium*-mediated gene  
140 transfer was performed based on protocols established in our laboratory (Yan and  
141 Wang, 2007).

### 142 *Molecular detection of transgenic plantlets*

143 To evaluate whether the overexpressing box had been integrated into the transgenic

144 plant genome, we amplified the *CaMV35S* promoter from isolated genomic DNA,  
145 using previously published protocols (Yang *et al.*, 2017). Total RNA from the roots of  
146 *S. miltiorrhiza* transgenic lines was extracted and converted into cDNA. Gene  
147 expression was monitored via qRT-PCR, with housekeeping gene *SmUbiquitin*  
148 serving as an internal reference. Relative expression was analyzed according to the  
149 comparative  $2^{-\Delta\Delta Ct}$  method (Livak and Schmittgen, 2001).

150 Based on the transcript levels of *SmbHLH37*, we conducted qRT-PCR analysis to  
151 determine the expression levels of key enzyme genes for the biosynthetic pathways of  
152 Sal B, JA, and anthocyanin. Each sample from a transgenic line was assayed with  
153 three independent biological replicates and three technical replicates.

#### 154 *Determination of anthocyanin concentrations*

155 Extraction and quantification of anthocyanins was performed in accordance with the  
156 protocols of Mano *et al* (2007), with minor modifications. 20 mg samples of powder  
157 from transgenic or wild type plants were extracted with 1 mL of acidic methanol (1%  
158 [v/v] HCl) for 1 h at 20 °C, with moderate shaking (100 rpm). After centrifugation  
159 (12000 rpm, room temperature, 5 min), 0.7 mL of the supernatant was added to 0.7  
160 mL of chloroform. Absorption of the extracts at wavelengths of 530 and 657 nm was  
161 determined photometrically (DU 640 Spectrophotometer, Beckman Instruments).  
162 Quantitation of anthocyanins was performed using the following equation: Q  
163 (anthocyanins)=(A530-0.25×A657)×M<sup>-1</sup>, where Q (anthocyanins) is the  
164 concentration of anthocyanins, A530 and A657 are the absorptions at the wavelengths  
165 indicated, and M is the dry weight (in grams) of the plant tissue used for extraction.

#### 166 *Determination of phenolics and JA concentrations by LC/MS analysis*

167 Roots were collected from two-month-old transgenic plantlets and air-dried at 20±2 °C.  
168 The phenolic compounds were extracted and determined as described by Li *et al*  
169 (2018).

170 To determine the concentration of JA, we extracted JA using a modified protocol as  
171 described (Yang *et al.*, 2012). Approximately 0.1-g root samples were homogenized  
172 and added to 10 mL of cold extraction buffer (acetone: 50 mM citric acid, 7:3, v/v).

173 After this mixture was vortexed and then left to stand 30 min at 4 °C, 10 mL of ethyl  
174 acetate was added before vortexing again. Following centrifugation at 5000 g for 10  
175 min at 4 °C, the supernatants were transferred to new 50-mL tubes and evaporated to  
176 dryness in a freeze dryer. The residue of each sample was re-suspended in 1 mL of 80%  
177 methanol (v/v) and sonicated for 10 min, then passed through a 0.22- $\mu$ m organic filter.  
178 The extracts were loaded onto an Agela Cleanert SPE-NH<sub>2</sub> (500 mg/6 mL);  
179 sonication and filtration steps were repeated. The combined supernatants were used  
180 for JA detection.

181 We determined the concentrations of JA in the plant samples by LC-QQQ-MS.  
182 Briefly, analyses were conducted using an Agilent 1260 HPLC system coupled to an  
183 Agilent 6460 QQQ LC-MS system equipped with a dual electrospray ion source  
184 operated in the negative mode. The extracts were separated on a Welch Ultimate  
185 XB-C18 column (2.1  $\times$  150 mm, 3  $\mu$ m). The chromatographic separation was  
186 performed over an 8-min analysis time, using a linear gradient of 85% to 50% A  
187 (0–6 min), 50% to 0% A (6–7 min), and 0% to 0% A (7–8 min). The flow rate of the  
188 gradient mobile phase was 0.4 mL/min, and the column temperature was 30°C.  
189 Conditions for mass spectrometry included a drying gas temperature of 300 °C, drying  
190 gas flow of 10 L/min, nebulizer pressure of 45 psi, ion spray voltage of 3500 V, and  
191 sheath gas of 11 L/min, at a temperature of 350°C. Retention time was 6.9 min for JA.  
192 The precursor/product ion of JA was 209.1>59.1. The concentrations were quantified  
193 based on standard curves prepared with authentic reference standards.

#### 194 *Bimolecular fluorescent complementation (BiFC)*

195 The ORFs of *SmJAZ1/3/8* and *SmMYC2* without the termination codon were  
196 individually cloned into the pDONR207 vector through Gateway reactions and  
197 re-combined into the pEarleyGate202–YC (YC) vector to generate YC–*SmJAZ1/3/8*  
198 and YC–*SmMYC2*. Likewise, the ORF of *SmbHLH37* without the termination codon  
199 was inserted into the YC vector or pEarleyGate201–YN (YN) to construct  
200 YC–*SmbHLH37* and YN–*SmbHLH37*. The YC and YN recombinant plasmids were  
201 mixed at equal densities before co-transformation.

202 The plasmids were transiently transformed into onion epidermis cells by particle  
203 bombardment (helium pressure, 1100 psi) with the PDS-1000/He system (Bio-Rad,  
204 CA, USA). After 24 h of incubation, those cells were stained with DAPI (Vector Labs,  
205 CA, USA) for 20 min and then observed using a Leica DM6000B microscope (Leica,  
206 Germany) with an excitation wavelength of 475 nm.

#### 207 *Yeast two-hybrid (Y2H) assays*

208 The full-length coding sequence of *SmbHLH37* was cloned into the pGADT7 or  
209 pGBKT7 vector, while those of *SmJAZ1/3/8* and *SmMYC2* were cloned into the  
210 pGADT7 vector. To test potential auto-activation of the prey, vectors of  
211 pGBKT7–*SmbHLH37* and pGADT7 were co-transformed. Empty vectors of  
212 pGADT7 and pGBKT7 were also co-transformed as a negative control. The two types  
213 of recombinant vectors were co-transformed into yeast strain AH109 by the  
214 PEG/LiAC method (Zhou and Memelink, 2016). Interaction assays were performed  
215 according to manufacturer's protocol for the Matchmaker Gold Yeast Two-Hybrid  
216 System (Clontech, USA), and Y2H images were taken on Day 5 of incubation.

#### 217 *Yeast one-hybrid (Y1H) assays*

218 The ORFs of *SmbHLH37* and *SmMYC2* were individually amplified by PCR using  
219 primers containing *Bam*HI and *Eco*RI restriction sites. They were fused to the GAL4  
220 activation domain in vector pGADT7–Rec2 (Clontech) to create the fusion proteins  
221 pGADT7–*SmbHLH37* and pGADT7–*SmMYC2*. The ~798-bp, ~1350-bp, and  
222 ~1146-bp promoter regions of *SmPAL1*, *SmTAT1*, and *SmCYP98A14*, respectively,  
223 were amplified and cloned into pHIS2 (Clontech). These recombinant vectors were  
224 co-transformed into yeast strain Y187 according to the reported protocol (Huang *et al.*,  
225 2013). The transformed cells were cultured on an SD/-Leu/-Trp medium and then  
226 selected on an SD/-Leu/-Trp/-His medium supplemented with 60 mM 3-amino-1, 2,  
227 4-triazole to examine any protein–DNA interactions.

#### 228 *Assay of transient transcriptional activity (TTA) in Nicotiana benthamiana*

229 For assaying transient transcriptional activity, we amplified and cloned the ~798-bp,  
230 ~1350-bp, and ~1146-bp promoter regions of *SmPAL1*, *SmTAT1*, and *SmCYP98A14*,



231 respectively, into the pGreenII 0800–LUC (luciferase) vector (Hellens *et al.*, 2005) to  
232 generate our reporter construct. The full-length coding sequences of *SmMYC2* and  
233 *SmbHLH37* were inserted into the pGreenII62–SK vector as the effector. Transient  
234 expression was monitored in *N. benthamiana* leaves according to the protocols of  
235 Sparkes *et al.* (2006). After 3 d of infiltration, activities of firefly LUC and renilla  
236 luciferase (REN) were measured using a dual-luciferase reporter gene assay kit  
237 (Beyotime Biotechnology, China) and a GloMax 20/20 luminometer (Promega, USA).  
238 Relative LUC activity was calculated by normalizing it against REN activity.

## 239 **Results**

### 240 *SmbHLH37 forms homodimer and interacts with SmJAZ3/8*

241 *SmbHLH37* can be dramatically induced by exogenous MeJA (Zhang *et al.*, 2015).  
242 We previously showed that *SmbHLH37* is most similar to AtJAM3 (Su *et al.*, 2017),  
243 which interacts with JAZs in *Arabidopsis* (Fonseca, 2014; Sasaki-Sekimoto *et al.*,  
244 2014). To detect whether *SmbHLH37* and SmJAZs could interact with each other in *S.*  
245 *miltiorrhiza*, we performed BiFC and Y2H assays. Our results demonstrated that  
246 *SmbHLH37* interacts with SmJAZ3/8 (Fig. 1A, B). Among the JAZ proteins in *S.*  
247 *miltiorrhiza*, SmJAZ8 has been verified as being involved in the biosynthesis of  
248 salvianolic acids and tanshinones (Ge *et al.*, 2015; Pei *et al.*, 2018). The bHLH  
249 protein usually forms a homodimer or heterodimer to develop their function (Feller *et*  
250 *al.*, 2006). Our findings indicated that *SmbHLH37* does form a homodimer (Fig. 1A,  
251 B). Moreover, *SmbHLH37* do not interact with SmMYC2.

### 252 *Overexpression of SmbHLH37 decreases endogenous JA concentrations and affects* 253 *JA signal pathway*

254 Using PCR amplifications, we confirmed that the transgenic plants indeed contained  
255 an expected 721-bp fragment of the CaMV 35S promoter (Supplementary Fig. S1A).  
256 Real-time quantitative PCR demonstrated that expression of *SmbHLH37* was highest  
257 in Lines OE-4 and OE-7 when compared with the non-transformed wild type (WT)  
258 (Supplementary Fig. S1B). Therefore, we chose those two lines for further analysis.  
259 JA is derived from  $\alpha$ -linolenic acid and the biosynthesis pathway was shown in Fig.

260 **2A.** The transcript levels of genes encoding LOX (lipoxygenase), AOS (allene oxide  
261 synthase), AOC (allene oxide cyclase), and OPR3 (12-oxophytodienoic acid reductase)  
262 were significantly down-regulated in OE lines (Fig. 2B). We performed LC-MS to  
263 determine the concentrations of endogenous JA in fresh root samples from OE and  
264 WT lines. The MRM chromatograms, shown in Supplementary Fig. S2, revealed that  
265 those JA levels were significantly decreased in OE-4 and OE-7 when compared with  
266 the control (Fig. 2C). These results implied that *SmbHLH37* participates in JA  
267 biosynthesis in *S. miltiorrhiza*.

268 We further examined the transcription changes of genes encoding JAZ proteins and  
269 MYC2, core factors in the JA signaling pathway. Our qRT-PCR results showed that  
270 overexpression of *SmbHLH37* significantly decreased the transcript levels of  
271 *SmJAZ1/3/8* and *SmMYC2* (Fig. 3).

272 *SmbHLH37* negatively regulates anthocyanin biosynthetic pathway through  
273 transcriptional cascade

274 We tested whether this regulation of a transcriptional cascade by *SmbHLH37* alters  
275 anthocyanin levels and found that concentrations of this pigment were significantly  
276 lower in OE-4 and OE-7 than in the WT (Fig. 4A, B). We also investigated the  
277 expression profiles of genes for anthocyanin biosynthesis, e.g., *CHS* (chalcone  
278 synthase), *F3'H* (flavonoid 3'-hydroxylase), *F3'5'H* (flavonoid 3'5'-hydroxylase), *FLS*  
279 (flavonol synthase), and *DFR* (dihydroflavonol 4-reductase). All were significantly  
280 down-regulated in OE lines, with *DFR* showing the largest fold-change (Fig. 4C).

281 *Overexpression of SmbHLH37 decreases concentrations of phenolic acids*

282 We predicted that the production of salvianolic acids would be decreased because of  
283 the decline in JA levels. To test this, we performed LC-MS to determine the  
284 concentrations of RA and Sal B. As shown by the MRM chromatograms in  
285 Supplementary Fig. S2, the results were consistent with our expectations, i.e., the  
286 levels of RA and Sal B were significantly declined in OE lines (respective reductions  
287 of 2.0- and 1.8-fold for RA and Sal B in OE-4; 1.7- and 1.6-fold for RA and Sal B in  
288 OE-7) when compared with the WT (Fig. 5). To evaluate how the expression of genes

289 related to phenolic acid biosynthesis is influenced in transgenic lines, we monitored  
290 relative transcript levels for 11 enzyme genes in the WT and OE lines (Fig. 5).  
291 Expression of all tested genes was significantly decreased in OE plants. In particular,  
292 transcript levels of *RAS6* were decreased 6.0- and 5.1-fold in OE-4 and OE-7,  
293 respectively.

#### 294 *SmbHLH37 binds to and represses promoters of SmTAT1 and SmPAL1*

295 The bHLH TFs function by binding to the E/G-box of the target gene promoter.  
296 Although 29 enzyme genes have been predicted to participate in phenolic acid  
297 biosynthesis in *S. miltiorrhiza* (Wang *et al.*, 2015), only a few have been verified as  
298 doing so, including *SmPAL1* (Song and Wang, 2011), *SmTAT1* (Xiao *et al.*, 2011),  
299 and *SmCYP98A14* (Di *et al.*, 2013). Each of them carries E/G-box sequences in its  
300 promoter (Fig. 6A). We speculated whether *SmbHLH37* is directly involved in  
301 regulating the pathway of phenolic acid biosynthesis. Our results from the Y1H assay  
302 showed that *SmbHLH37* directly binds to the promoters of *SmTAT1* and *SmPAL1*  
303 rather than *SmCYP98A14* in yeast (Fig. 6B).

304 We then conducted an assay of transient transcriptional activity in *N. benthamiana*  
305 leaves. The promoter regions of *SmTAT1*, *SmPAL1*, and *SmCYP98A14* were fused  
306 individually with LUC to generate the reporter, and *SmbHLH37*, driven by the 35S  
307 promoter, was used as an effector (Fig. 6C). As showed in Fig. 6D, *SmbHLH37* did  
308 bind to the promoter regions of *SmTAT1* and *SmPAL1* to repress the expression of  
309 LUC. The same was not true for *SmCYP98A14*. Therefore, these results demonstrated  
310 that *SmbHLH37* directly binds to the promoter regions of *SmTAT1* and *SmPAL1* to  
311 repress their expression.

#### 312 *SmMYC2 binds to and activates promoters of SmTAT1, SmPAL1, and SmCYP98A14*

313 We have reported that overexpression of *SmMYC2* strongly increases the production  
314 of RA and Sal B, and those transcript levels of *SmTAT1* and *SmPAL1* are dramatically  
315 improved in *SmMYC2*-OE lines (Yang *et al.*, 2017). However, the molecular  
316 mechanism had not yet been characterized. Here, we performed Y1H assays and  
317 examined transient transcriptional activity to verify whether *SmMYC2* directly binds

318 to the promoter regions of these genes to activate their expression. Results from our  
319 Y1H assay showed that *SmMYC2* did bind to the promoter regions of *SmTAT1*,  
320 *SmPAL1*, and *SmCYP98A14* (Fig. 7A).

321 To conduct transient transcriptional activity analysis, *SmMYC2* was used as an  
322 effector (Fig. 7B). *SmMYC2* activated the expression of *SmTAT1*, *SmPAL1*, and  
323 *SmCYP98A14*, based on our data from the assay of transient transcriptional activity  
324 (Fig. 7C). We also learned that *SmbHLH37* can repress *SmMYC2*-activated LUC  
325 expression, as driven by the promoters of *SmTAT1* and *SmPAL1* (Fig. 7C). Together,  
326 these findings suggested that *SmbHLH37* antagonizes transcription activator  
327 *SmMYC2* in the Sal B biosynthesis pathway.

## 328 Discussion

329 Jasmonates are widely distributed in the plant kingdom (Browse, 2009). They are  
330 derived from  $\alpha$ -linolenic acid and the biosynthetic enzymes consist of LOX, AOS,  
331 AOC, and OPR (Wasternack, 2007). The JAM1/2/3, members of the bHLHs IIIId  
332 subfamily in *A. thaliana*, have redundant functions that negatively regulate the JA  
333 metabolic pathway (Nakata *et al.*, 2013; Nakata and Ohme-Takagi, 2013). We  
334 previously reported that *SmbHLH37* is most closely associated with AtJAM3 and  
335 belongs to the IIIId subfamily (Su *et al.*, 2017). Here, overexpression of *SmbHLH37*  
336 significantly decreased the level of endogenous JA by repressing the transcripts of  
337 *LOX*, *AOC*, *AOS*, and *OPR3*. This indicated that *SmbHLH37* is involved in JA  
338 biosynthesis in *S. miltiorrhiza*.

339 Application of exogenous MeJA is an effective way to improve the yields of  
340 secondary metabolites. Earlier research showed that JA signaling has a role in the  
341 biosynthesis of salvianolic acids and tanshinones (Xiao *et al.*, 2009; Zhang *et al.*,  
342 2011b; Pei *et al.*, 2018). Expression of genes in the salvianolic acid and tanshinone  
343 biosynthetic pathways is increased significantly after MeJA treatment (Ge *et al.*, 2015;  
344 Pei *et al.*, 2018). Our results also indicated that overexpression of *SmbHLH37*  
345 significantly decreased RA and Sal B concentrations. Such accumulation profiles  
346 were consistent with the expression profiles of all the tested genes involved in Sal B

347 biosynthesis. We previously proposed that *SmbHLH37* helps modulate tanshinone  
348 biosynthesis because it is up-regulated by MeJA treatment and is more highly  
349 expressed in the roots than in any other organs (Zhang *et al.*, 2015). We also detected  
350 tanshinone IIA and cryptotanshinone but found no significant differences in amounts  
351 between control plants and *SmbHLH37*-OE lines (data not shown).

352 Activation of JA signaling can also improve the accumulation of anthocyanin in *S.*  
353 *miltiorrhiza* (Ge *et al.*, 2015). Here, overexpression of *SmbHLH37* significantly  
354 decreased the levels of anthocyanin as well as the expression of genes in its  
355 biosynthetic pathway. One gene, *DFR*, has a vital role in anthocyanin production  
356 (Lim *et al.*, 2016), and we noted that it had the greatest fold-change among the five  
357 genes tested here. Therefore, overexpression of *SmbHLH37* repressed overall the  
358 biosynthetic pathways for JA, anthocyanin, and salvianolic acids, which is contrary to  
359 the activation of JA signaling.

360 MYC2 is a core TF in the plant response to jasmonates, inducing JA-mediated  
361 responses such as wounding, inhibition of root growth, JA and anthocyanin  
362 biosynthesis, and adaptations to oxidative stress (Dombrecht *et al.*, 2007). The JAZ  
363 proteins directly interact with MYC2 and inhibit its activity, meaning that they  
364 function as repressors of the JA pathway (Chini *et al.*, 2007; Thines *et al.*, 2007; Seo  
365 *et al.*, 2011; Song *et al.*, 2011). In *S. miltiorrhiza*, the SmJAZs have proven to be  
366 negative regulators of salvianolic acid and tanshinone biosynthesis (Ge *et al.*, 2015;  
367 Shi *et al.*, 2016; Pei *et al.*, 2018). In contrast, the orthologs of MYC2 act as positive  
368 regulators (Zhou *et al.*, 2016; Yang *et al.*, 2017). Although overexpression of  
369 *SmMYC2* increases the production of phenolic acids in *S. miltiorrhiza* (Yang *et al.*,  
370 2017), the responsible molecular mechanism is still unclear.

371 The bHLH TFs function by binding to the E/G box of the target gene promoters  
372 (Shoji and Hashimoto, 2011). Transcriptomic and qRT-PCR analyses of *SmMYC2*-OE  
373 and control plants of *S. miltiorrhiza* have shown that transcript levels for *SmPAL1* and  
374 *SmTAT1* are increased by 367.1-fold and 110-fold, respectively, in the transgenics  
375 (Yang *et al.*, 2017). Both genes contain the E/G-box sequences in their promoters.  
376 Our Y1H and transient transcriptional activity assays with tobacco leaves also

377 demonstrated that SmMYC2 directly binds to the promoters of *SmPAL1* and *SmTAT1*  
378 to activate their expression. Previous electronic mobility shift assays have shown that  
379 SmMYC2a and SmMYC2b bind with the E-box within the *SmCYP98A14* promoter *in*  
380 *vitro* (Zhou *et al.*, 2016). We also confirmed here that SmMYC2 up-regulates the  
381 expression of *SmCYP98A14* by binding to its promoter in yeast. Our analysis  
382 indicated that the sequence of *SmMYC2a* is almost completely consistent with that of  
383 *SmMYC2*. Therefore, we speculate that they are the same gene.

384 In *Arabidopsis*, JAM1/2/3 function as transcription repressors to antagonize the  
385 transcription activator MYC2 by binding to its target sequences (Song *et al.*, 2013; Qi  
386 *et al.*, 2015b). Our results from Y1H and transient transcriptional activity assays  
387 showed that SmbHLH37 represses *SmPAL1* and *SmTAT1* by binding to their  
388 promoters. Moreover, we found that SmbHLH37 employs antagonistic regulation  
389 with SmMYC2 by binding to the promoters of the same target genes. These results  
390 are consistent with the relationship described between JAM1/2/3 and MYC2 in  
391 *Arabidopsis* (Song *et al.*, 2013; Qi *et al.*, 2015b).

392 Based on our results and previous reports, we propose a model to illustrate the  
393 JA-induced accumulation of salvianolic acids (Fig. 8). In it, we confirm that  
394 SmbHLH37 regulates such accumulations in *S. miltiorrhiza* by engineering the  
395 biosynthetic pathway genes. That protein also shows antagonistic regulation with  
396 SmMYC2 because they bind to the promoters of the same target genes. Jasmonate  
397 induces the degradation of JAZ proteins, thereby releasing SmMYC2 and SmbHLH37.  
398 The former binds to and activates the promoters of genes involved in salvianolic acid  
399 biosynthesis (e.g., *SmTAT1*, *SmPAL1*, and *SmCYP98A14*), ultimately promoting the  
400 accumulation of those salvianolic acids. Meanwhile, SmbHLH37 represses these  
401 genes and antagonizes this accumulation that is activated by SmMYC2. Both  
402 *SmbHLH37* and *SmJAZs* are more highly expressed in *SmMYC2*-OE lines than in the  
403 control (Su *et al.*, 2017; Yang *et al.*, 2017). In contrast, we found here that expression  
404 of *SmMYC2* and *SmJAZs* was lower in *SmbHLH37*-OE lines than in the WT. These  
405 data suggest that SmMYC2 activates SmJAZs and SmbHLH37, while SmbHLH37  
406 suppresses SmMYC2 and SmJAZs. Although more research is needed on the

407 relationships among SmJAZs, SmMYC2, and SmbHLH37, we speculate that  
408 over-expressing SmMYC2 and silencing SmbHLH37 simultaneously is a promising  
409 genetic engineering strategy to dramatically enhance concentrations of salvianolic  
410 acids.

#### 411 **Supplementary data**

412 **Fig. S1.** Detection of *SmbHLH37*-overexpressing transgenic lines of *Salvia*  
413 *miltiorrhiza*.

414 **Fig. S1.** MRM maps of JA standard and samples.

415 **Figure 3** MRM maps of RA and Sal B standards and samples.

416 **Table S1.** Primers used for vector construction.

417 **Table S2.** Primers used for quantitative real-time PCR.

#### 418 **Acknowledgements**

419 This work was funded by the National Natural Science Foundation of China  
420 (31870276 and 31670299); the Natural Science Foundation of Shaanxi Province,  
421 China (2018JZ3001); the National Key Technologies R & D Program for  
422 Modernization of Traditional Chinese Medicine (2017YFC1701300); Major Project  
423 of Shaanxi Province, China (2017ZDXM-SF-005); and Fundamental Research Funds  
424 for the Central Universities (GK201706004).

## References

- Browse J.** 2009. Jasmonate passes muster: a receptor and targets for the defense hormone. *Annual Review of Plant Biology* **60**, 183–205.
- Carretero-Paulet L, Galstyan A, Roig-Villanova I, Martínez-García JF, Bilbao-Castro JR, Robertson DL.** 2010. Genome-wide classification and evolutionary analysis of the bHLH family of transcription factors in *Arabidopsis*, poplar, rice, moss, and algae. *Plant Physiology* **153**, 1398-1412.
- Chico JM, Chini A, Fonseca S, Solano R.** 2008. JAZ repressors set the rhythm in jasmonate signaling. *Current Opinion in Plant Biology* **11**, 486-494.
- Chini A, Fonseca S, Fernán G, Adie B, Chico JM, Lorenzo O, García-A-Casado G, LãPez-Vidriero I, Lozano FM, Ponce MR.** 2007. The JAZ family of repressors is the missing link in jasmonate signalling. *Nature* **448**, 666-671.
- Di P, Zhang L, Chen J, Tan H, Ying X, Xin D, Xun Z, Chen W.** 2013. <sup>13</sup>C Tracer Reveals Phenolic Acids Biosynthesis in Hairy Root Cultures of *Salvia miltiorrhiza*. *Acs Chemical Biology* **8**, 1537-1548.
- Dombrecht B, Xue G, Sprague S, Kirkegaard J, Ross J, Reid J, Fitt G, Sewelam N, Schenk P, Manners J.** 2007. MYC2 differentially modulates diverse jasmonate-dependent functions in *Arabidopsis*. *Plant Cell* **19**, 2225-2245.
- Earley KW, Haag JR, Pontes O, Opper K, Juehne T, Song K, Pikaard CS.** 2006. Gateway-compatible vectors for plant functional genomics and proteomics. *Plant Journal* **45**, 616-629.
- Ezer D, Shepherd SJ, Brestovitsky A, Dickinson P, Cortijo S, Charoensawan V, Box MS, Biswas S, Jaeger K, Wigge PA.** 2017. The G-box transcriptional regulatory code in *Arabidopsis*. *Plant Physiology* **175**, 628-640.
- Farmer EE.** 2007. Jasmonate perception machines. *Nature*. **448**, 659-660.
- Feller A, Hernandez JM, Grotewold E.** 2006. An ACT-like domain participates in the dimerization of several plant basic-helix-loop-helix transcription factors. *Journal of Biological Chemistry* **281**, 28964-28974.
- Fonseca S, Fernándezcalvo P, Fernández GM, Dézdáz M, Gimenezibanez S, Lópezvidriero I, Godoy M, Fernándezbarbero G, Leene JV, Jaeger GD.** 2014. bHLH003, bHLH013 and bHLH017 are new targets of JAZ repressors negatively regulating JA responses. *Plos One* **9**, e86182.
- Ge Q, Zhang Y, Hua WP, Wu YC, Jin XX, Song SH, Wang ZZ.** 2015. Combination of transcriptomic and metabolomic analyses reveals a JAZ repressor in the jasmonate signaling pathway of *Salvia miltiorrhiza*. *Scientific Reports* **5**, 14048.
- Goossens J, Mertens J, Goossens A.** 2017. Role and functioning of bHLH transcription factors in jasmonate signalling. *Journal of Experimental Botany* **68**, 1333-1347.



- Guo Y, Li Y, Xue L, Severino RP, Gao S, Niu J, Qin LP, Zhang D, Brömme D.** 2014. *Salvia miltiorrhiza* : An ancient Chinese herbal medicine as a source for anti-osteoporotic drugs. *Journal of Ethnopharmacology* **155**, 1401-1416.
- Han JY, Fan JY, Horie Y, Miura S, Cui DH, Ishii H, Hibi T, Tsuneki H, Kimura I.** 2008. Ameliorating effects of compounds derived from *Salvia miltiorrhiza* root extract on microcirculatory disturbance and target organ injury by ischemia and reperfusion. *Pharmacology & Therapeutics* **117**, 280-295.
- Hellens RP, Allan AC, Friel EN, Bolitho K, Grafton K, Templeton MD, Karunairetnam S, Gleave AP, Laing WA.** 2005. Transient expression vectors for functional genomics, quantification of promoter activity and RNA silencing in plants. *Plant Methods* **1**, 13-13.
- Hichri I, Barrieu F, Bogs J, Kappel C, Delrot S, Lauvergeat V.** 2011. Recent advances in the transcriptional regulation of the flavonoid biosynthetic pathway. *Journal of Experimental Botany* **62**, 2465-2483.
- Huang XS, Wang W, Zhang Q, Liu JH.** 2013. A basic helix-loop-helix transcription factor, PtrbHLH, of *Poncirus trifoliata* confers cold tolerance and modulates peroxidase-mediated scavenging of hydrogen peroxide. *Plant Physiology* **162**, 1178-1194.
- Katsir L, HS C, AJ K, GA H.** 2008. Jasmonate signaling: a conserved mechanism of hormone sensing. *Current Opinion in Plant Biology* **11**, 428-435.
- Lim SH, You MK, Kim DH, Kim JK, Lee JY, Ha SH.** 2016. RNAi-mediated suppression of dihydroflavonol 4-reductase in tobacco allows fine-tuning of flower color and flux through the flavonoid biosynthetic pathway. *Plant Physiology and Biochemistry* **109**, 482-490.
- Livak KJ, Schmittgen TD.** 2001. Analysis of relative gene expression data using real-time quantitative PCR and the  $2^{-\Delta\Delta Ct}$  method. *Method* **25**, 402-408.
- Li SS, Wu YC, Kuang J, Wang HQ, Du TZ, Huang YY, Zhang Y, Cao XY, Wang ZZ.** 2018. SmMYB111 is a key factor to phenolic acid biosynthesis and interacts with both SmTTG1 and SmbHLH51 in *Salvia miltiorrhiza*. *Journal of Agricultural & Food Chemistry* **66**, 8069–8078.
- Lorenzo O, Chico JM, Sánchezserrano JJ, Solano R.** 2004. JASMONATE-INSENSITIVE1 encodes a MYC transcription factor essential to discriminate between different jasmonate-regulated defense responses in *Arabidopsis*. *Plant Cell* **16**, 1938-1950.
- Ma P, Liu J, Osbourn A, Dong J, Liang Z.** 2015. Regulation and metabolic engineering of tanshinone biosynthesis. *RSC Advances*. **5**, 18137-18144.
- Ma P, Liu J, Zhang C, Liang Z.** 2013. Regulation of water-soluble phenolic acid biosynthesis in *Salvia miltiorrhiza* Bunge. *Applied Biochemistry & Biotechnology* **170**, 1253-1262.
- Mano H, Ogasawara F, Sato K, Higo H, Minobe Y.** 2007. Isolation of a regulatory gene of anthocyanin biosynthesis in tuberous roots of purple-fleshed sweet potato. *Plant Physiology* **143**,

1252-1268.

**Nakata M, Mitsuda N, Herde M, Koo AJ, Moreno JE, Suzuki K, Howe GA, Ohme-Takagi M.** 2013. A bHLH-type transcription factor, ABA-INDUCIBLE BHLH-TYPE TRANSCRIPTION FACTOR/JA-ASSOCIATED MYC2-LIKE1, acts as a repressor to negatively regulate jasmonate signaling in *Arabidopsis*. *Plant Cell* **25**, 1641-1656.

**Nakata M, Ohme-Takagi M.** 2013. Two bHLH-type transcription factors, JA-ASSOCIATED MYC2-LIKE2 and JAM3, are transcriptional repressors and affect male fertility. *Plant Signaling & Behavior* **8**, e26473.

**Pei T, Ma P, Ding K, Liu S, Jia Y, Ru M, Dong J, Liang Z.** 2018. SmJAZ8 acts as a core repressor regulating JA-induced biosynthesis of salvianolic acids and tanshinones in *Salvia miltiorrhiza* hairy roots. *Journal of Experimental Botany* **69**, 1663–1678.

**Pires N, Dolan L.** 2010. Origin and diversification of basic-helix-loop-helix proteins in plants. *Molecular Biology & Evolution* **27**, 862-874.

**Qi T, Huang H, Song S, Xie D.** 2015a. Regulation of Jasmonate-Mediated Stamen Development and Seed Production by a bHLH-MYB Complex in *Arabidopsis*. *Plant Cell* **27**, 1620-1633.

**Qi T, Wang J, Huang H, Liu B, Gao H, Liu Y, Song S, Xie D.** 2015b. Regulation of jasmonate-induced leaf senescence by antagonism between bHLH subgroup IIIe and IIIId factors in *Arabidopsis*. *Plant Cell* **27**, 1634-1649.

**Sasaki-sekimoto Y, Saito H, Masuda S, Shirasu K, Ohta H.** 2014. Comprehensive analysis of protein interactions between JAZ proteins and bHLH transcription factors that negatively regulate jasmonate signaling. *Plant Signaling & Behavior* **9**, e27639.

**Seo JS, Joo J, Kim MJ, Kim YK, Nahm BH, Song SI, Cheong JJ, Lee JS, Kim JK, Choi YD.** 2011. OsbHLH148, a basic helix-loop-helix protein, interacts with OsJAZ proteins in a jasmonate signaling pathway leading to drought tolerance in rice. *Plant Journal* **65**, 907-921.

**Sheard LB, Xu T, Mao H, John W, Gili BN, Hinds TR, Yuichi K, Fong-Fu H, Michal S, John B.** 2010. Jasmonate perception by inositol phosphate-potentiated COI1-JAZ co-receptor. *Nature* **468**, 400-405.

**Shi M, Zhou W, Zhang J, Huang S, Wang H, Kai G.** 2016. Methyl jasmonate induction of tanshinone biosynthesis in *Salvia miltiorrhiza* hairy roots is mediated by JASMONATE ZIM-DOMAIN repressor proteins. *Scientific Reports* **6**, 20919.

**Shoji T, Hashimoto T.** 2011. Tobacco MYC2 regulates jasmonate-inducible nicotine biosynthesis genes directly and by way of the NIC2-locus ERF genes. *Plant Cell Physiology* **52**,

1117-1130.

**Song J, Wang ZZ.** 2011. RNAi-mediated suppression of the phenylalanine ammonia-lyase gene in *Salvia miltiorrhiza* causes abnormal phenotypes and a reduction in rosmarinic acid biosynthesis.

Journal of Plant Research **124**, 183-192.

**Song S, Qi T, Fan M, Zhang X, Gao H, Huang H, Wu D, Guo H, Xie D.** 2013. The bHLH subgroup IIIId factors negatively regulate jasmonate-mediated plant defense and development. Plos Genetics **9**, e1003653.

**Song S, Qi T, Huang H, Ren Q, Wu D, Chang C, Peng W, Liu Y, Peng J, Xie D.** 2011. The Jasmonate-ZIM domain proteins interact with the R2R3-MYB transcription factors MYB21 and MYB24 to affect Jasmonate-regulated stamen development in *Arabidopsis*. Plant Cell **23**, 1000-1013.

**Sparkes IA, Runions J, Kearns A, Hawes C.** 2006. Rapid, transient expression of fluorescent fusion proteins in tobacco plants and generation of stably transformed plants. Nature Protocols **1**, 2019-2025.

**SU CY, Ming QL, Khalid R, Han T, Qin LP.** 2015. *Salvia miltiorrhiza*: Traditional medicinal uses, chemistry, and pharmacology. Chinese Journal of Natural Medicines **13**, 163-182.

**Su J, Yang N, Wang X, Du T, Li S, LU Zhang T, Cao X.** 2017. Cloning, subcellular localization and expression analysis of SmbHLH37 gene in *Salvia miltiorrhiza*. Journal of Agricultural Biotechnology **25**, 884-892.

**Thines B, Katsir L, Melotto M, Niu Y, Mandaokar A, Liu G, Nomura K, He SY, Howe GA, Browse J.** 2007. JAZ repressor proteins are targets of the SCF(COI1) complex during jasmonate signalling. Nature **448**, 661-665.

**Todd AT, Liu E, Polvi SL, Pammatt RT, Page JE.** 2010. A functional genomics screen identifies diverse transcription factors that regulate alkaloid biosynthesis in *Nicotiana benthamiana*. Plant Journal **62**, 589-600.

**Tsai M, Lin YL, Huang YT.** 2010. Effects of salvianolic acids on oxidative stress and hepatic fibrosis in rats. Toxicology and Applied Pharmacology **242**, 155-164.

**Wang B, Sun W, Li Q, Li Y, Luo H, Song J, Sun C, Qian J, Zhu Y, Hayward A.** 2015. Genome-wide identification of phenolic acid biosynthetic genes in *Salvia miltiorrhiza*. Planta **241**, 711-725.

**Wang D, Song Y, Chen Y, Yao W, Li Z, Liu W, Yue S, Wang Z.** 2013. Metabolic pools of phenolic acids in *Salvia miltiorrhiza* are enhanced by co-expression of *Antirrhinum majus Delila* and *Roseal* transcription factors. Biochemical Engineering Journal **74**, 115-120.

**Wasternack C.** 2007. Jasmonates: an update on biosynthesis, signal transduction and action in plant stress response, growth and development. Annals of Botany **100**, 681-697.

**Xiao Y, Gao SH, Peng D, Chen JF, Chen WS, Zhang L.** 2009. Methyl jasmonate dramatically

enhances the accumulation of phenolic acids in *Salvia miltiorrhiza* hairy root cultures. *Physiologia Plantarum* **137**, 1-9.

**Xiao Y, Zhang L, Gao S, Saechao S, Di P, Chen J, Chen W.** 2011. The c4h, tat, hppr and hppd genes prompted engineering of rosmarinic acid biosynthetic pathway in *Salvia miltiorrhiza* hairy root cultures. *Plos One* **6**, e29713.

**Yan YP, Wang ZZ,** 2007. Genetic transformation of the medicinal plant *Salvia miltiorrhiza* by *Agrobacterium tumefaciens*-mediated method. *Plant Cell Tissue & Organ Culture* **88**, 175-184.

**Yang DH, Hettenhausen C, Baldwin IT, Wu J.** 2012. Silencing *Nicotiana attenuata* calcium-dependent protein kinases, CDPK4 and CDPK5, strongly up-regulates wound- and herbivory-induced jasmonic acid accumulations. *Plant Physiology* **159**, 1591-1607.

**Yang N, Zhou W, Su J, Wang X, Li L, Wang L, Cao X, Wang Z.** 2017. Overexpression of SmMYC2 increases the production of phenolic acids in *Salvia miltiorrhiza*. *Frontiers in Plant Science* **8**, 1804.

**Zeng M, Pan L, Qi S, Cao Y, Zhu H, Guo L, Zhou J.** 2013. Systematic review of recent advances in pharmacokinetics of four classical Chinese medicines used for the treatment of cerebrovascular disease. *Fitoterapia* **88**, 50-75.

**Zhang H, Hedhili S, Montiel G, Zhang Y, Chatel G, Pr éM, Gantet P, Memelink J.** 2011. The basic helix-loop-helix transcription factor CrMYC2 controls the jasmonate-responsive expression of the ORCA genes that regulate alkaloid biosynthesis in *Catharanthus roseus*. *Plant Journal* **67**, 61-71.

**Zhang S, Liu Y, Shen S, Liang Z, Yang D.** 2011. Effects of elicitors on accumulation of phenolic acids and tanshinones in *Salvia miltiorrhiza* hairy root. *China Journal of Chinese Materia Medica* **36**, 1269-1274.

**Zhang X, Luo H, Xu Z, Zhu Y, Ji A, Song J, Chen S.** 2015. Genome-wide characterisation and analysis of bHLH transcription factors related to tanshinone biosynthesis in *Salvia miltiorrhiza*. *Scientific Reports* **5**, 11244.

**Zhang Y, Yan YP, Wang ZZ.** 2010. The Arabidopsis PAP1 transcription factor plays an important role in the enrichment of phenolic acids in *Salvia miltiorrhiza*. *Journal of Agricultural & Food Chemistry* **58**, 12168-12175.

**Zhang Y, Yan YP, Wu YC, Hua WP, Chen C, Ge Q, Wang ZZ.** 2014. Pathway engineering for phenolic acid accumulations in *Salvia miltiorrhiza* by combinational genetic manipulation. *Metabolic Engineering* **21**, 71-80.

**Zhao GR, Zhang HM, Ye TX, Xiang ZJ, Yuan YJ, Guo ZX, Zhao LB.** 2008. Characterization of the radical scavenging and antioxidant activities of danshensu and salvianolic acid B. *Food & Chemical Toxicology* **46**, 73-81.

**Zhou M, Memelink J.** 2016. Jasmonate-responsive transcription factors regulating plant secondary metabolism. *Biotechnology Advances* **34**, 441-449.

**Zhou Y, Sun W, Chen J, Tan H, Xiao Y, Li Q, Ji Q, Gao S, Chen L, Chen S.** 2016. SmMYC2a and SmMYC2b played similar but irreplaceable roles in regulating the biosynthesis of tanshinones and phenolic acids in *Salvia miltiorrhiza*. *Scientific Reports* **6**, 22852.

## Figure captions

**Fig. 1.** *SmbHLH37* interacts with *SmJAZ3*, *SmJAZ8*, and *SmbHLH37*. (A) Yeast two-hybrid assay to detect interactions. *SmJAZ1*, *SmJAZ3*, *SmJAZ8*, *SmMYC2*, and *SmbHLH37* were fused with activation domain (AD) while *SmbHLH37* was simultaneously fused with DNA-binding domain (BD). Transformed yeast cells were grown on SD/-Ade/-Leu/-Trp/-His/X- $\alpha$ -gal media. Different rows represent individual dilutions of cells. (B) Bimolecular fluorescent complementation experiments in onion epidermis cells. *SmJAZ1*, *SmJAZ3*, *SmJAZ8*, *SmMYC2*, and *SmbHLH37* were fused with C-terminal of fluorescein to produce *SmJAZ1*-YC, *SmJAZ3*-YC, *SmJAZ8*-YC, *SmMYC2*-YC, and *SmbHLH37*-YC, respectively. *SmbHLH37* was fused with N-terminal of fluorescein to produce *SmbHLH37*-YN. Recombinant vectors were co-transformed with corresponding empty vectors as control. Nucleus was located after staining with DAPI.

**Fig. 2.** Effects of *SmbHLH37* overexpression on pathway of JA biosynthesis. (A) Pathway Enzymes: LOX, lipoxygenase; AOS, allene oxide synthase; AOC, allene oxide cyclase; OPR3, 12-oxophytodienoate reductase 3. (B) Relative expression levels of genes involved in JA biosynthesis pathway. Expression values in WT were set to '1' (not shown). (C) Concentrations of JA in root extracts from *SmbHLH37*-overexpressing lines (OE) and wild type (WT). All data are means of 3 replicates, with error bars indicating SD; \*\*, values are significantly different from WT at  $P < 0.01$ .

**Fig. 3.** Results of qRT-PCR analysis on expression levels of *SmJAZs* and *SmMYC2* in *SmbHLH37*-overexpressing lines (OE) and wild type (WT). All data are means of 3 replicates, with error bars indicating SD; \* and \*\*, values are significantly different from WT at  $P < 0.05$  and  $P < 0.01$ , respectively.

**Fig. 4.** Effects of *SmbHLH37* overexpression on pathway for anthocyanin biosynthesis. (A) Concentrations of anthocyanin in roots of *SmbHLH37*-overexpressing lines (OE) and wild type (WT). (B) Color of root extracts.

(C) Relative expression levels of genes involved in pathway. CHS, chalcone synthase; F3'H, flavonoid 3'-hydroxylase; F3'5'H, flavonoid 3'5'-hydroxylase; FLS, flavonol synthase; DFR, dihydroflavonol 4-reductase. Expression values in WT were set to '1' (not shown). All data are means of 3 replicates, with error bars indicating SD; \* and \*\*, values are significantly different from WT at  $P < 0.05$  and  $P < 0.01$ , respectively.

**Fig. 5.** Effects of *SmbHLH37* overexpression on pathway for salvianolic acid biosynthesis. Enzymes: TAT, tyrosine aminotransferase; HPPR, hydroxyl phenylpyruvate reductase; PAL, phenylalanine ammonia lyase; C4H, cinnamate 4-hydroxylase; 4CL, hydroxycinnamate-CoA ligase; RAS, rosmarinic acid synthase; and CYP, cytochrome P450. Negative values in array indicate fold-change in *SmbHLH37*-overexpressing lines (OE-4 and OE-7) relative to wide type (WT). Bars show concentrations of salvianolic acid B (Sal B) and rosmarinic acid (RA) accumulated in roots of OEs and WT, determined by LC-MS. All data are means of 3 replicates, with error bars indicating SD; \*\*, values are significantly different from WT at  $P < 0.01$ .

**Fig. 6.** *SmbHLH37* binds to and represses promoters of *SmTAT1* and *SmPAL1*. (A) E-box fragments of *SmTAT1*, *SmPAL1*, and *SmCYP98A14* promoters. (B) Yeast one-hybrid assay to detect interaction between *SmbHLH37* and promoters of *SmTAT1*, *SmPAL1*, and *SmCYP98A14*. *SmbHLH37* was fused to GAL4 activation domain (AD). Promoter regions of *SmTAT1*, *SmPAL1* and *SmCYP98A14* were cloned into pHIS2 to construct pHIS2-*SmTAT1*, pHIS2-*SmPAL1*, and pHIS2-*SmCYP98A14*, respectively. Recombinant vectors were co-transformed into yeast strain Y187, and transformed cells were cultured on SD/-Leu/-Trp medium (DDO), then selected on SD/-Leu/-Trp/-His medium (TDO) supplemented with 60 mM 3-amino-1, 2, 4-triazole (3-AT) to examine protein-DNA interaction. The p53HIS2/pGADT7-p53 and p53HIS2/pGADT7 served as positive control and negative control, respectively. (C) Schematic diagram of constructs used in assays of transient transcriptional activity. (D) *SmbHLH37* represses promoters of *SmTAT1* and *SmPAL1*. Effector *SmbHLH37* was co-transformed with reporters *P<sub>TAT1</sub>-LUC*,

$P_{PAL1-LUC}$ , and  $P_{CYP98A14-LUC}$ . All data are means of 3 replicates, with error bars indicating SD; \* and \*\*, values are significantly different from WT at  $P < 0.05$  and  $P < 0.01$ , respectively.

**Fig. 7.** SmMYC2 binds to and activates promoters of *SmTAT1*, *SmPAL1*, and *SmCYP98A14*. (A) Yeast one-hybrid assay to detect interaction between SmMYC2 and promoters. SmMYC2 was fused to GAL4 activation domain (AD). Promoter regions of *SmTAT1*, *SmPAL1*, and *SmCYP98A14* were cloned into pHIS2 to construct pHIS2-*SmTAT1*, pHIS2-*SmPAL1*, and pHIS2-*SmCYP98A14*, respectively. Recombinant vectors were co-transformed into yeast strain Y187 and transformed cells were cultured on SD/-Leu/-Trp medium (DDO), then selected on SD/-Leu/-Trp/-His medium (TDO) supplemented with 60 mM 3-amino-1, 2, 4-triazole (3-AT) to examine protein-DNA interaction. The p53HIS2/pGADT7-p53 and p53HIS2/pGADT7 served as positive control and negative control, respectively. (B) Schematic diagram of constructs used in assays of transient transcriptional activity. (C) Activation of *SmTAT1* and *SmPAL1* promoters by SmMYC2 is repressed by SmbHLH37. Effector SmMYC2, alone or together with SmbHLH37, was co-transformed with reporters  $P_{TAT1-LUC}$ ,  $P_{PAL1-LUC}$ , and  $P_{CYP98A14-LUC}$ . All data are means of 3 replicates, with error bars indicating SD; \* and \*\*, values are significantly different from WT at  $P < 0.05$  and  $P < 0.01$ , respectively.

**Fig. 8.** Model illustrating regulation of salvianolic acid biosynthesis by SmbHLH37. Upon perception of JA, JAZ proteins are targeted for degradation. SmbHLH37 and SmMYC2 are then released to regulate, antagonistically or coordinately, their target genes (e.g., *SmTAT1* and *SmPAL1*), which further modulates accumulation of salvianolic acids. SmbHLH37 acts as transcription repressor of JA signaling in *Salvia miltiorrhiza*.

**Fig 1**

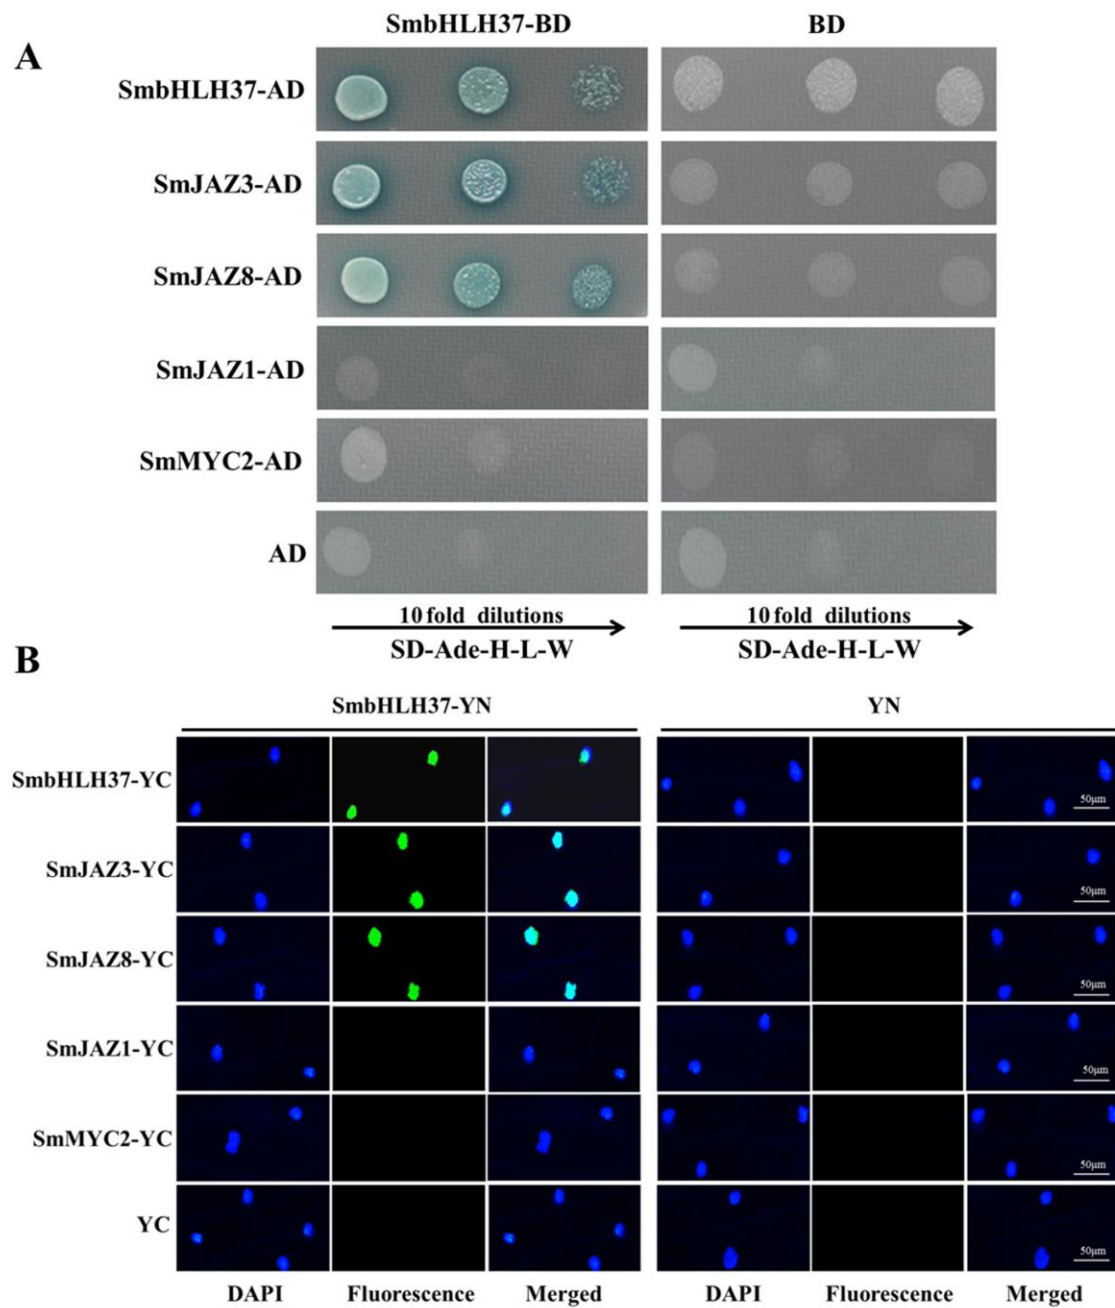



**Fig 2**

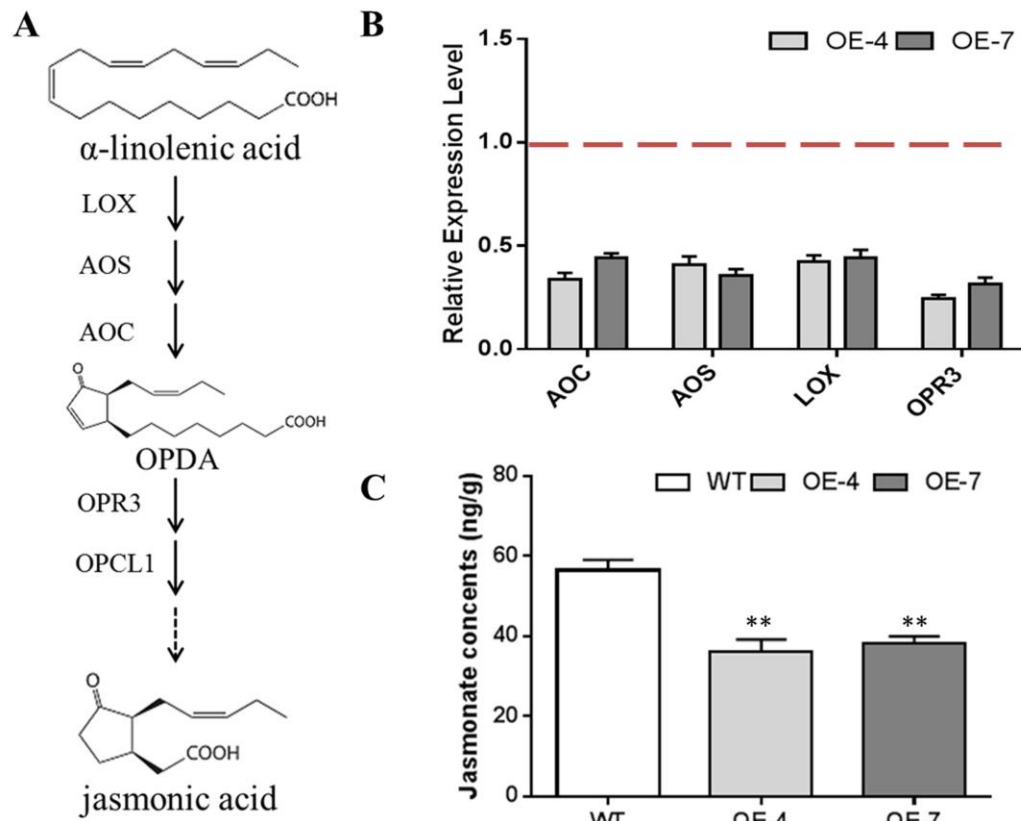

**Fig 3**

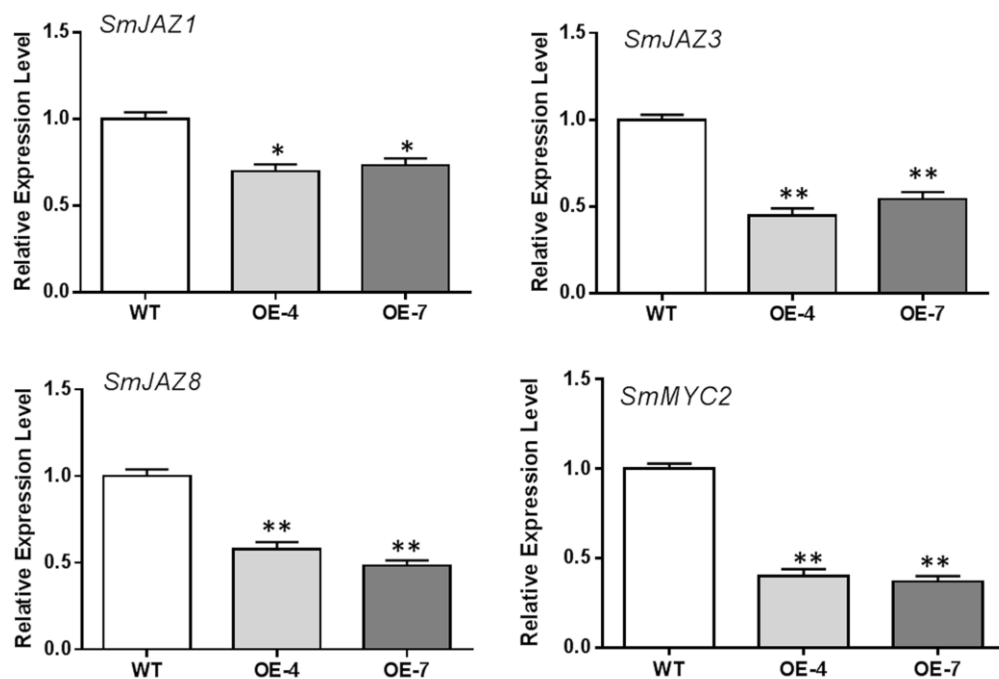

**Fig 4**

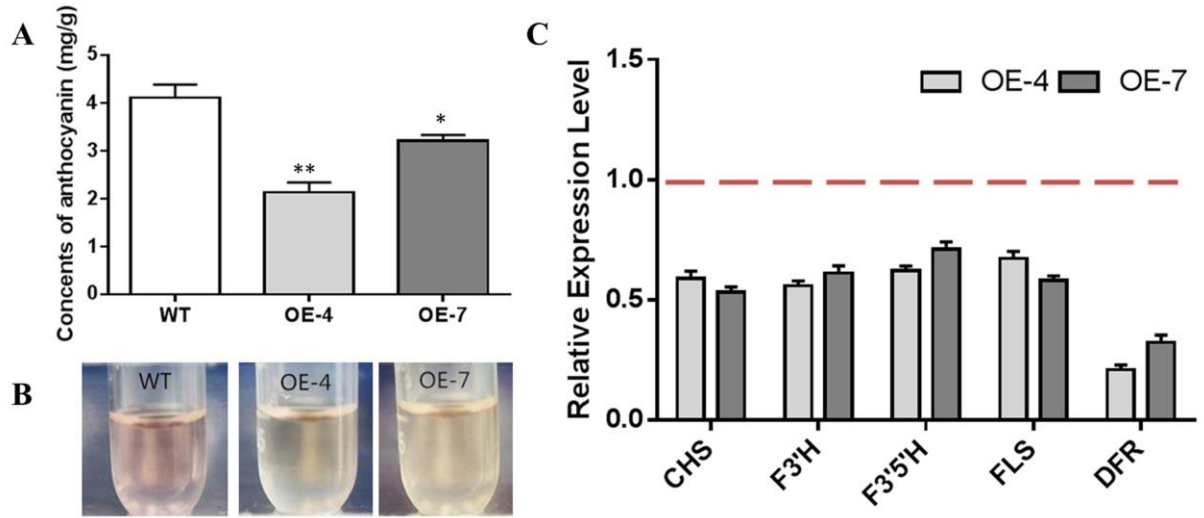

**Fig 5**

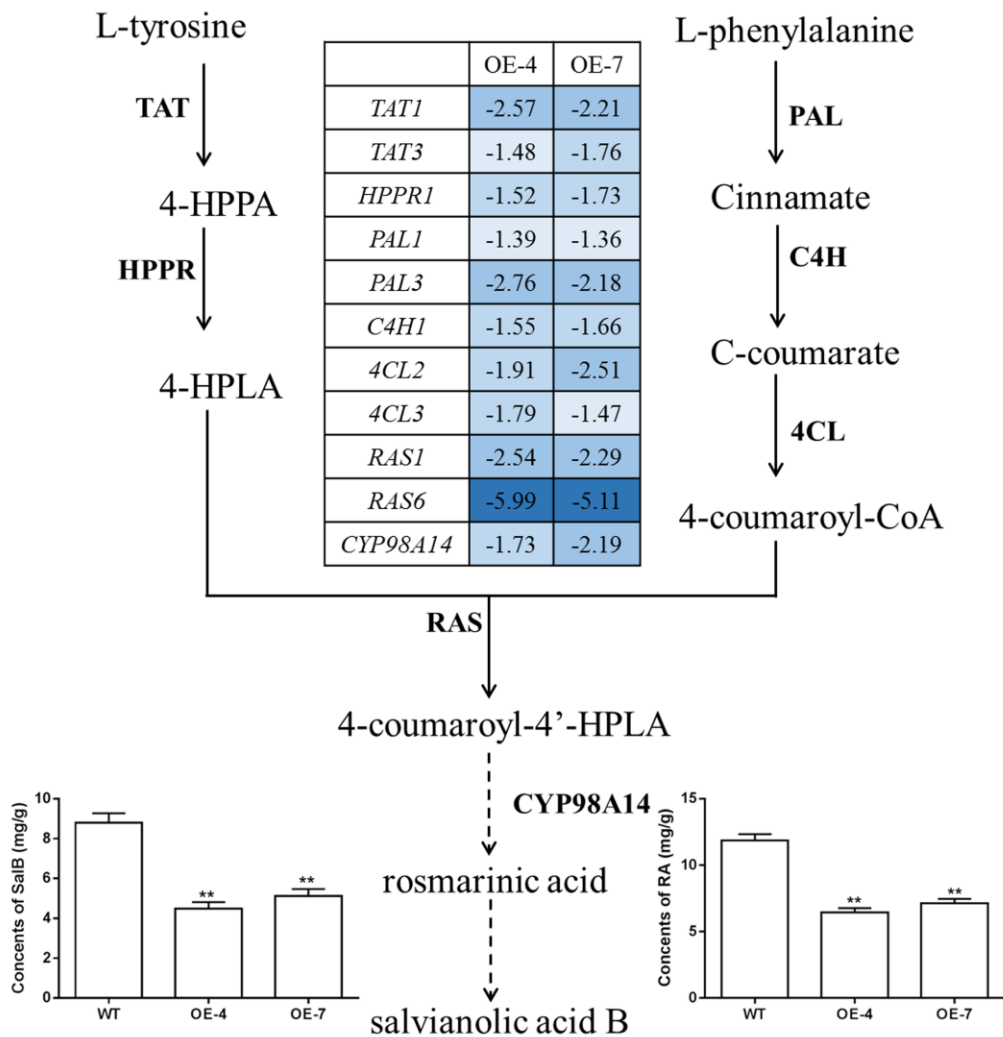

**Fig 6**

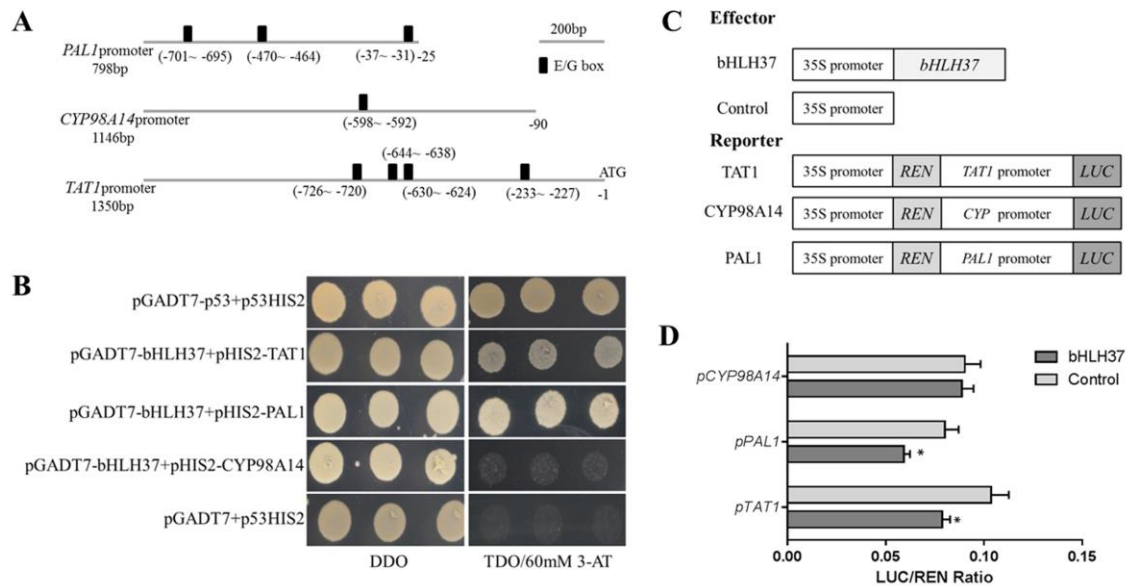

**Fig 7**

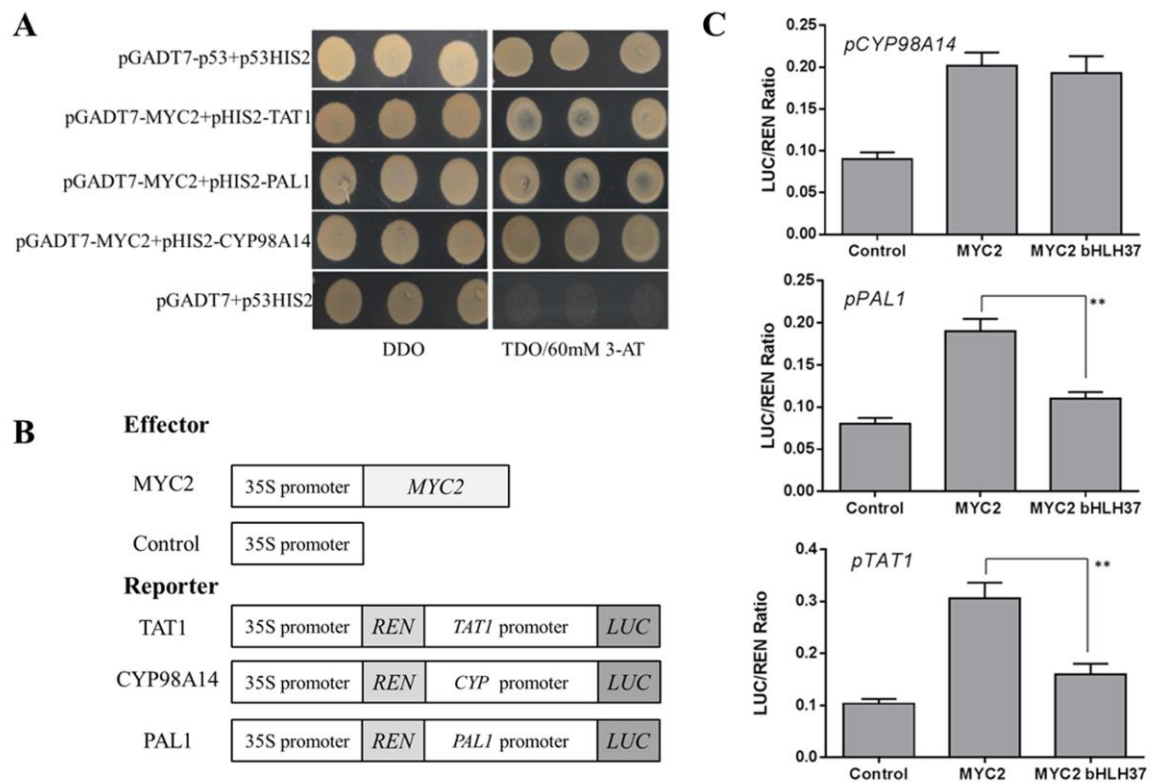

**Fig 8**

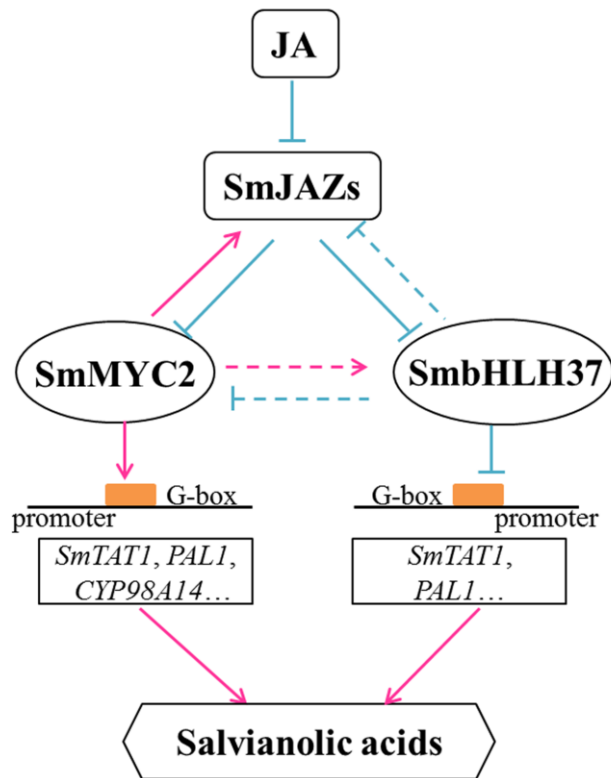

Source: https://www.biorxiv.org/content/10.1101/438143v1.full.pdf
